# Supplementary material for: Discriminating between Different Heavy Metal Ions with Fullerene-Derived Nanoparticles
Source: Sensors (Basel). 2018 May 10;18(5):1496. doi: 10.3390/s18051496 (PMC5982591; doi:10.3390/s18051496)
Supplement: Supplementary file 1 [file sensors-18-01496-s001.pdf]

## Supporting Information

# Discriminating between Different Heavy Metal Ions with Fullerene-Derived Nanoparticles

Erica Ciotta, Paolo Proposito, Pietro Tagliatesta, Chiara Lorecchio, Lorenzo Stella, Saulius Kaciulis, Peiman Soltani, Ernesto Placidi and Roberto Pizzoferrato

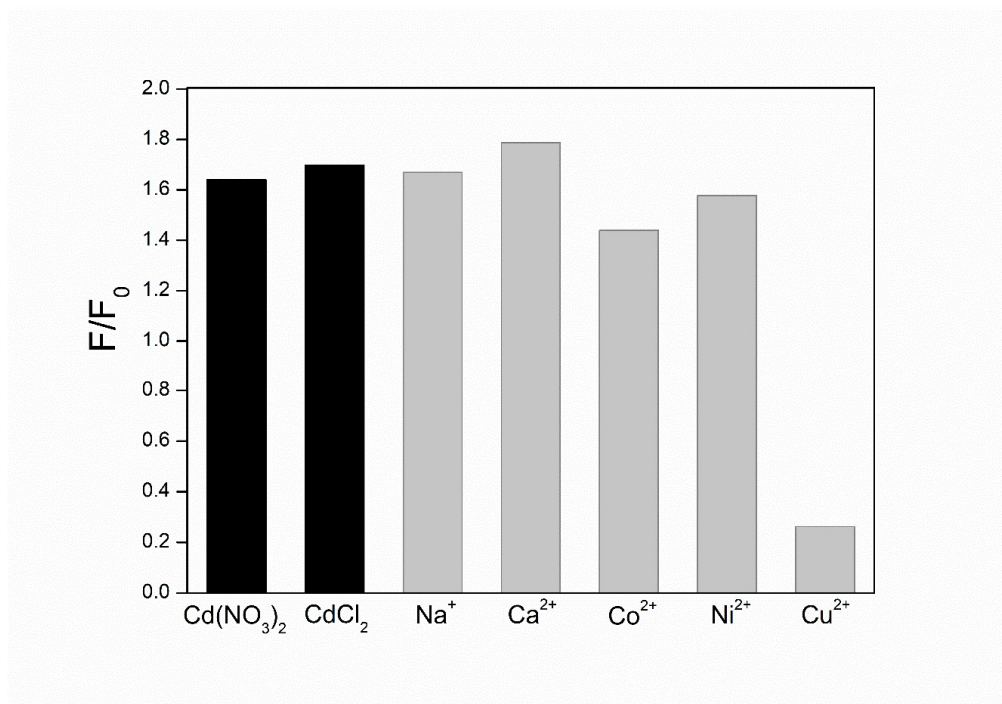

**Figure S1.** Fluorescence quenching ratio of UFQD reference solution in the presence of various metal ions: (black bars) in the presence of different salts of cadmium with a concentration of 100  $\mu\text{M}$  of  $\text{Cd}^{2+}$ ; (grey bars) in the presence of various metal ions at 100  $\mu\text{M}$ , followed by 100  $\mu\text{M}$  of  $\text{Cd}^{2+}$ .

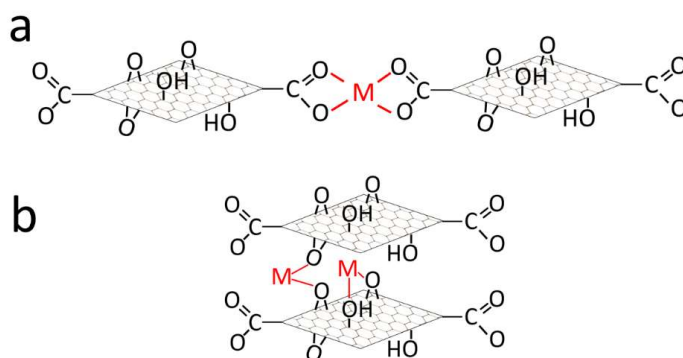

**Scheme S1.** Possible mechanisms of aggregation: (a) edge-to-edge through chelating carboxyl groups; (b) face-to-face staking through either weak alkoxide or dative bonds from carbonyl and hydroxyl groups.

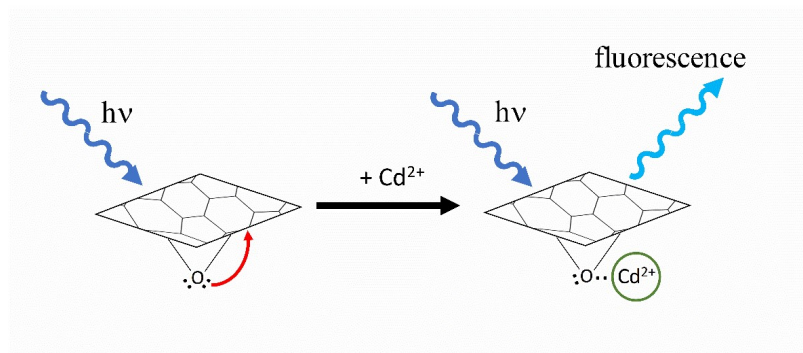

**Scheme S2.** Schematic of the chelation enhanced fluorescence (CHEF) process due to the chelation of a  $\text{Cd}^{2+}$  ion which immobilizes the oxygen electron lone pair.

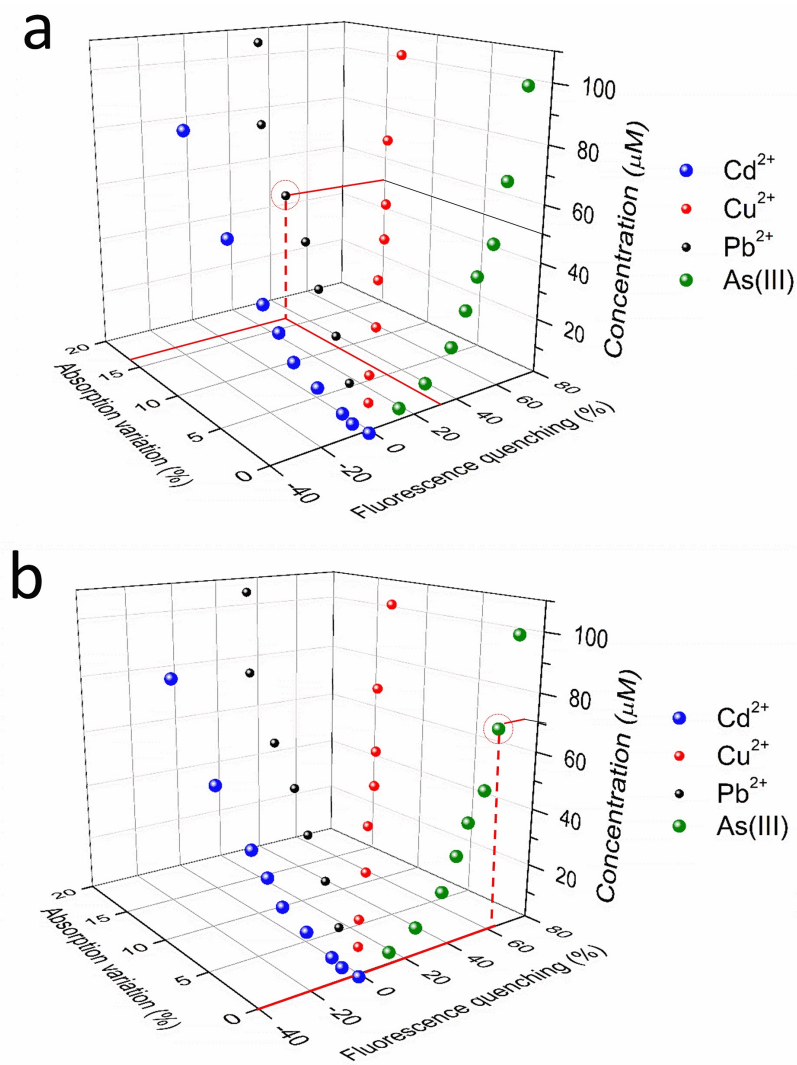

**Figure S2.** Two examples of applications of the three-dimensional calibration diagram. In (a) a fluorescence quenching by 33% and an increase of absorbance by 16% (marked by the red solid lines) uniquely correspond to 50  $\mu\text{M}$  of  $\text{Pb}^{2+}$ ; in (b) a 62% variation of fluorescence intensity with no variation of absorbance uniquely correspond to 70  $\mu\text{M}$  of  $\text{As(III)}$ .
